# Supplementary material for: Dietary B group vitamin intake and the bladder cancer risk: a pooled analysis of prospective cohort studies
Source: Springer Nature journal article supplement (doi:10.1007/s00394-022-02805-2), 2022-02-07
Supplement: MOESM1 [file 20107626]

**Supplementary Table 1:** Hazard ratios and 95% confidence intervals for BC according to dietary B group vitamin intake in the BLEND study, excluding cases who received their diagnosis within 5 years after enrolment

|                                               |   | Overall (n=532,231) |                     |                     |        |
|-----------------------------------------------|---|---------------------|---------------------|---------------------|--------|
|                                               |   | Low                 | Moderate            | High                | P      |
| <b>Thiamin (B1)</b>                           |   |                     |                     |                     |        |
| Overall                                       | 1 |                     | 1.11<br>(1.00-1.23) | 1.03<br>(0.93-1.15) | <0.001 |
| <b>Riboflavin (B2)</b>                        |   |                     |                     |                     |        |
| Overall                                       | 1 |                     | 1.07<br>(0.97-1.19) | 0.96<br>(0.87-1.07) | <0.001 |
| <b>Niacin (B3)</b>                            |   |                     |                     |                     |        |
| Overall                                       | 1 |                     | 1.04<br>(0.94-1.15) | 0.97<br>(0.87-1.07) | <0.001 |
| <b>Pyridoxine (B6)</b>                        |   |                     |                     |                     |        |
| Overall                                       | 1 |                     | 1.02<br>(0.92-1.13) | 0.96<br>(0.87-1.07) | <0.001 |
| <b>Folate (B9)</b>                            |   |                     |                     |                     |        |
| Overall                                       | 1 |                     | 1.06<br>(0.96-1.18) | 0.97<br>(0.87-1.08) | <0.001 |
| <b>Cyanocobalamin (B12)</b>                   |   |                     |                     |                     |        |
| Overall                                       | 1 |                     | 0.97<br>(0.88-1.07) | 0.93<br>(0.83-1.04) | <0.001 |
| <b>Energy metabolism (B1*B2*B3)</b>           |   |                     |                     |                     |        |
| Overall                                       | 1 |                     | 1.08<br>(0.98-1.20) | 1.00<br>(0.90-1.11) | <0.001 |
| <b>Oxidative stress reduction (B2*B6)</b>     |   |                     |                     |                     |        |
| Overall                                       | 1 |                     | 1.04<br>(0.94-1.16) | 0.96<br>(0.87-1.06) | <0.001 |
| <b>DNA stability (B9*B12)</b>                 |   |                     |                     |                     |        |
| Overall                                       | 1 |                     | 1.01<br>(0.92-1.12) | 0.93<br>(0.84-1.04) | <0.001 |
| <b>Vitamin B complex (B1*B2*B3*B6*B9*B12)</b> |   |                     |                     |                     |        |
| Overall                                       | 1 |                     | 1.10<br>(0.99-1.21) | 0.95<br>(0.85-1.06) | <0.001 |



|           |             |                   |                   |                   |                   |                   |      |
|-----------|-------------|-------------------|-------------------|-------------------|-------------------|-------------------|------|
| Beverages |             | 23.34<br>(<0.001) | 23.34<br>(<0.001) | 23.34<br>(<0.001) | 23.34<br>(<0.001) | 23.78<br>(<0.001) | n.a. |
| Male      | 0.33 (3.70) |                   | 0.48 (5.34)       | 1.66 (18.48)      | 0.77 (8.62)       | 37.65 (415.01)    |      |
| Female    | 0.15 (1.49) |                   | 0.22 (2.16)       | 0.76 (0.74)       | 0.36 (3.48)       | 17.07 (166.53)    |      |

---





*Supplementary Table 2: Sensitivity analysis*
